# Supplementary material for: Features of Solution Behavior of Polymer Stars with Arms of Poly-2-alkyl-2-oxazolines Copolymers Grafted to the Upper Rim of Calix[8]arene
Source: MDPI journal article supplement (doi:10.3390/polym13152507), 2021-07-29
Supplement: s1 [file s1]

## Supplementary Materials

### Features of solution behavior of polymer stars with arms of poly-2-alkyl-2-oxazoline copolymers grafted to the upper rim of calix[8]arene

Tatyana Kirila <sup>1,\*</sup>, Alina Amirova <sup>1</sup>, Alexey Blokhin <sup>1</sup>, Andrey Tenkovtsev <sup>1</sup>, Alexander Filippov <sup>1</sup>

<sup>1</sup>Institute of Macromolecular Compounds of the Russian Academy of Sciences, Bolshoy pr., 31, Saint Petersburg, 199004 Russia

\*Corresponding author, E-mail: tatyana\_pyx@mail.ru

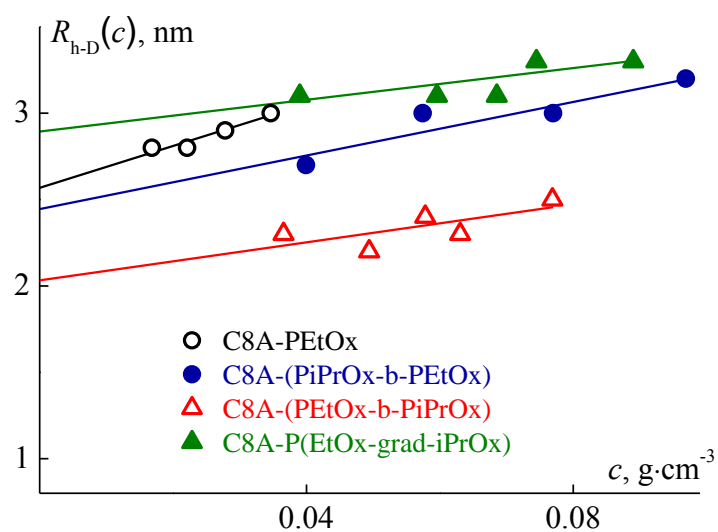

Figure S1. Plots of  $R_{h-D}(c)$  vs. concentration  $c$  for the studied polymer stars in 2-nitropropane.

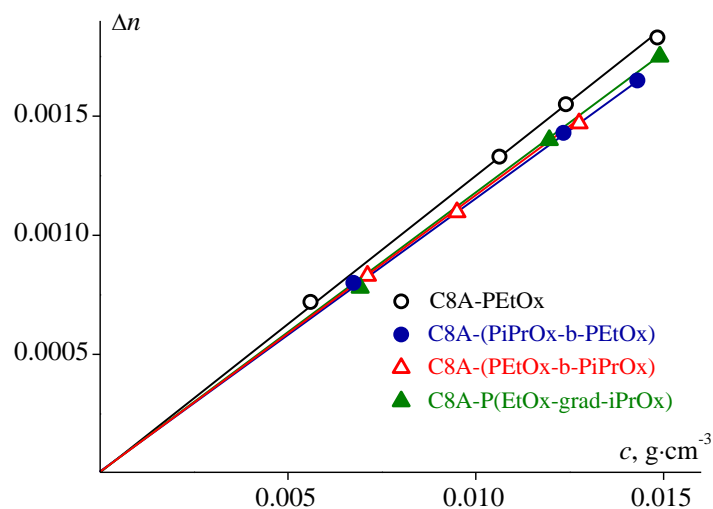

Figure S2. Concentration dependencies of  $dn$  for the C8A-PaOx solutions 2-nitropropane.

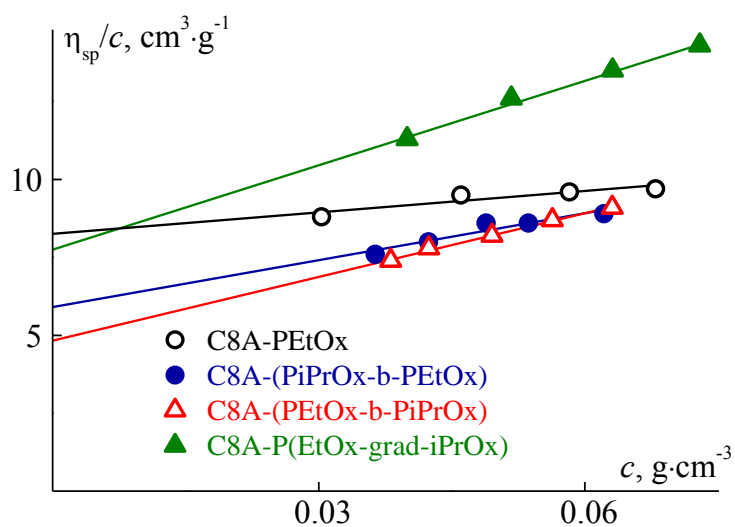

Figure S3. Reduced viscosity  $\eta_{sp}/c$  vs.  $c$  for the studied polymer stars in 2-nitropropane.

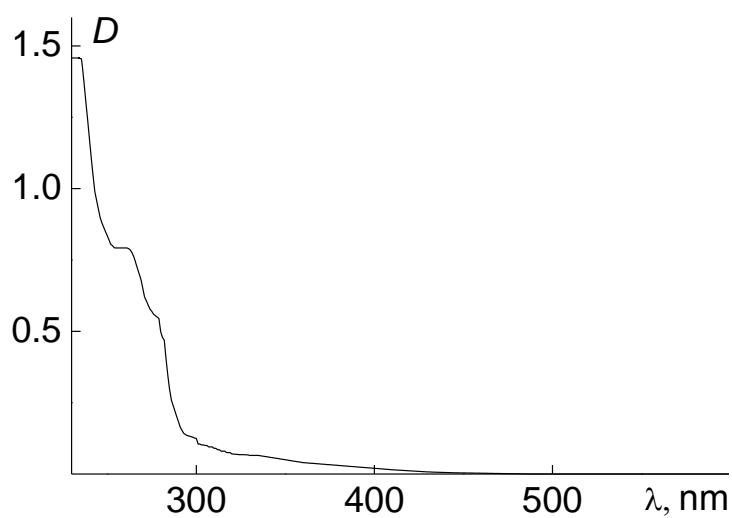

Figure S4. UV-visible spectrum of the star-shaped C8A-(PEtOx-b-PiPrOx)-UR solution in ethanol. Polymer concentration is  $0.005 \text{ g}\cdot\text{cm}^{-3}$ .

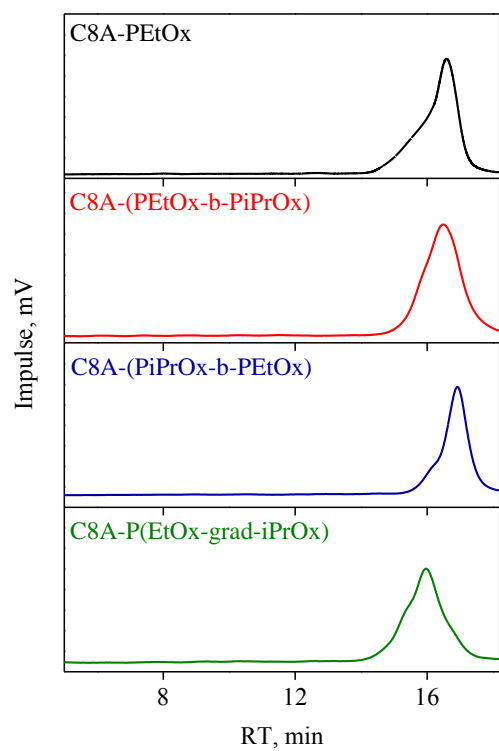

Figure S5. GPC traces of star copolymers C8A-PAIOx.

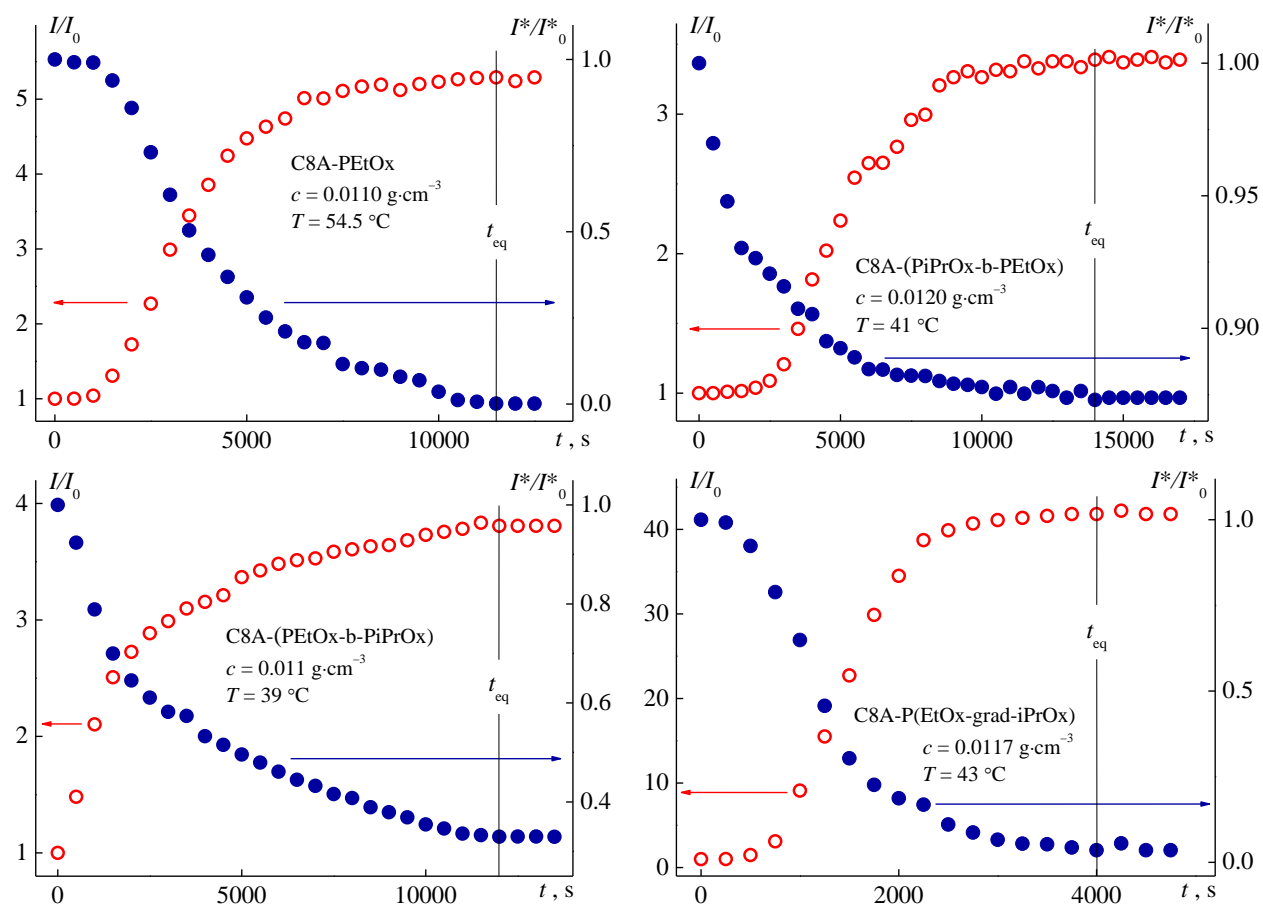

Figure S6. Time dependencies of light scattering intensity  $I/I_0$  and the transmission  $I^*/I_0^*$  for solutions C8A-PAIOx.  $I_0$  и  $I_0^*$  are values of light scattering intensity and the optical transmission at  $t = 0$ .
